# Supplementary material
Source: publisher figshare collection journal article supplement (https://acs.figshare.com/ndownloader/files/3846622)
Supplement: Supplementary file 1 [file 3846622]

## **Supporting Information for**

### **Preparation and properties of ion-imprinted hollow particles for the selective adsorption of silver ions**

Hongbin Hou, Demei Yu\* and Guohe Hu

---

Hongbin Hou, Prof. Demei Yu.

Key Laboratory for Non-Equilibrium Synthesis and Modulation of Condensed Matter,  
Ministry of Education, School of Science, Xi'an Jiaotong University, Xi'an, 710049,  
People's Republic of China.

State Key Laboratory of Electrical Insulation and Power Equipment, Xi'an Jiaotong  
University, Xi'an, 710049, People's Republic of China.

E-mail: dmyu@mail.xjtu.edu.cn

Dr. Guohe Hu

School of Science, Xi'an Jiaotong University, Xi'an, 710049, People's Republic of  
China.

---

## 1. Effects of pH value on $\text{Ag}^+$ absorption onto the Ag-IIPs

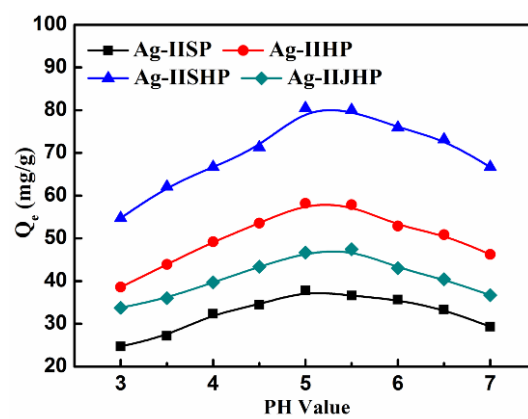

**Figure S1** Effects of pH value on  $\text{Ag}^+$  absorption onto the Ag-IIPs

## 2 Effects of CTS and template $\text{Ag}^+$ content on $\text{Ag}^+$ absorption onto the Ag-IIPs

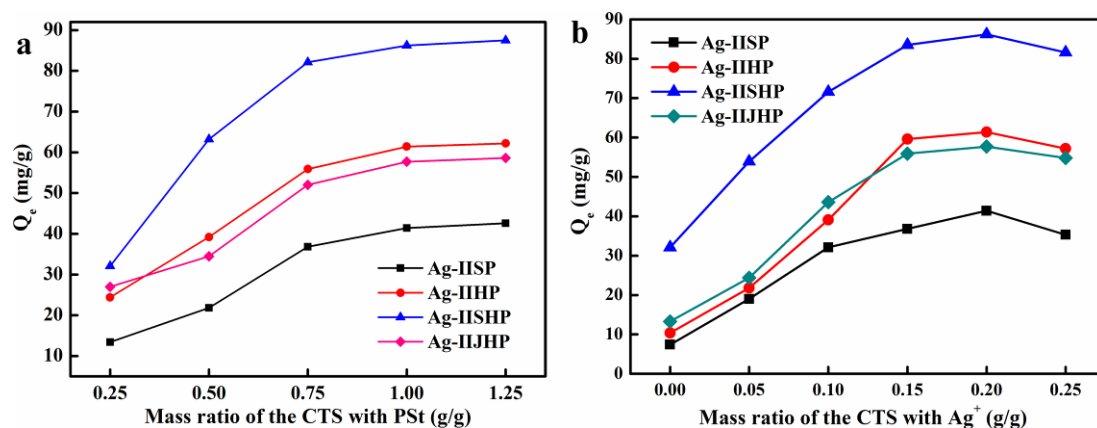

**Figure S2** The effect of (a) CTS & (b) template  $\text{Ag}^+$  content on  $\text{Ag}^+$  absorption onto the Ag-IIPs

The Ag-IIPs were prepared by CTS and polymer particles in accordance with the mass ratio of 0.25:1, 0.5:1, 0.75:1, 1:1, and 1.25:1, and the  $Q_e$  values of the Ag-IIPs were measured as shown in Figure S2a. Along with the increasing CTS content in Ag-IIPs, the  $Q_e$  values of the Ag-IIPs increased gradually to saturation as a result of more binding sites for the  $\text{Ag}^+$ . The growth rates of the  $Q_e$  were slower after the mass ratio was higher than 0.75:1. The epoxy groups in GMA were finite on the surface of polymer particles, so the redundant CTS were difficult to be introduced onto these particles. The redundant CTS were eliminated entirely by washing with 5% (wt) HAc aqueous solution. To avoid the waste, the mass ratio of CTS to polymer particles 1:1 was chosen as the optimal CTS content for the preparations of Ag-IIPs. In addition, the viscosity in system was too sticky due to high concentration CTS-HAc solution, and the resulting particles were difficult to separate. So the CTS concentration 0.5% (wt) was used to prepare the Ag-IIPs.

The Ag-IIPs were prepared by CTS and the template  $\text{Ag}^+$  in accordance with the mass ratio of 1:0, 1:0.05, 1:0.10, 1:0.15, 1:0.20, and 1:0.25, and the  $Q_e$  values of the

Ag-IIPs were measured as shown in Figure S2b. Along with the increasing template  $\text{Ag}^+$  content in Ag-IIPs, the  $Q_e$  values of Ag-IIPs increased first and decreased then, and the maximum  $Q_e$  values were observed when the mass ratio was 1:0.20. It was because more binding sites for the  $\text{Ag}^+$  could be generated at the higher template  $\text{Ag}^+$  content, but the overmany template  $\text{Ag}^+$  tended to clutter and stack with excessive increase. The formation of binding sites would be obstructed by the steric hindrance effects originated from the cluttered template  $\text{Ag}^+$ , and the elution of template  $\text{Ag}^+$  would be more difficult too. So the binding sites were insufficient for the complex of CTS with  $\text{Ag}^+$  at excessive template  $\text{Ag}^+$  content. Conversely, the Ag-IIPs were often unable to exert efficient imprinting performance with limited binding sites for  $\text{Ag}^+$ , and the nonselective adsorption would be fomented at lower template  $\text{Ag}^+$  content. Therefore, the mass ratio of CTS to template  $\text{Ag}^+$  1:0.20 was chosen as the optimal template  $\text{Ag}^+$  content for the preparation of the Ag-IIPs.

### 3 Reusability evaluations

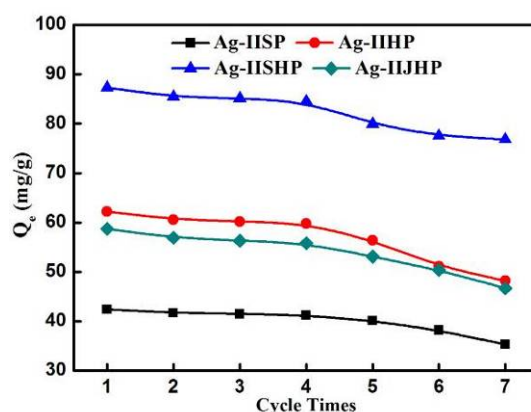

**Figure S3** Reusability for  $\text{Ag}^+$  adsorption onto the Ag-IIPs after seven reuse cycles

The reusability is a major factor for evaluating the practical application value of Ag-IIPs. The reuse cycles of Ag-IIPs were repeated seven times for  $\text{Ag}^+$  adsorption in same adsorption and desorption conditions. Fortunately, all the  $Q_e$  values of Ag-IIPs were decreased with the increasing cycles as shown in Figure S3, but Ag-IIPs could be effectively regenerated for further utilization with only about 5% - 8% loss of initial adsorption capacity. Compared to the fresh Ag-IIPs, there were no significant changes on  $\text{Ag}^+$  adsorption onto the Ag-IIPs used after seven times. So it was considered that the Ag-IIPs were capable of recycling favorably.

#### 4 Adsorption isotherms

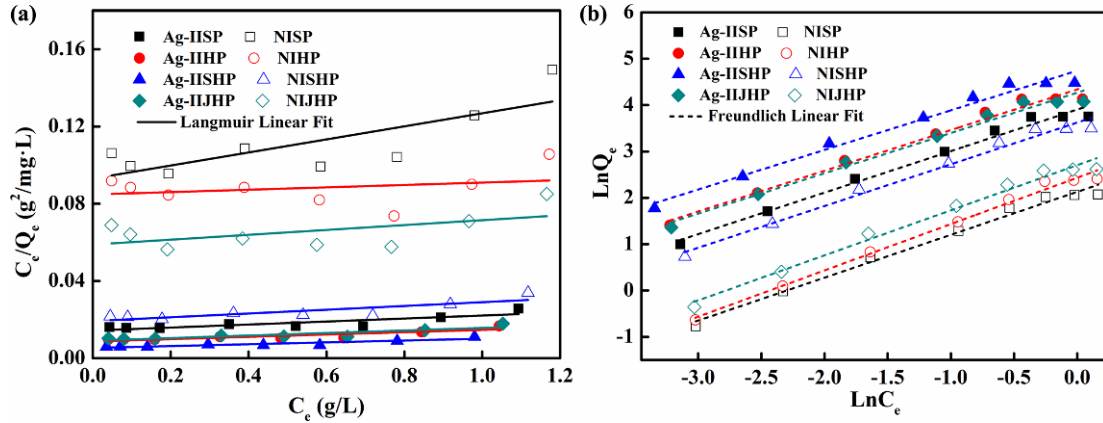

**Figure S4** The linear fit of Langmuir and Freundlich isotherm models for Ag<sup>+</sup> adsorption onto the Ag-IIPs and NIPs

The equilibrium adsorption isotherm is fundamental to describe the interaction between the adsorbate and the adsorbent, and is important on designing an adsorption system. The widely used Langmuir isotherm equation can be expressed by Eq. 1.

$$Q_e = \frac{Q_m k_L C_e}{1 + k_L C_e} \quad (1)$$

Where  $Q_e$  is the equilibrium adsorption capacity (mg·g<sup>-1</sup>),  $Q_m$  is the maximum adsorption capacity of the adsorbent (mg·g<sup>-1</sup>),  $C_e$  is the equilibrium concentrations of Ag<sup>+</sup> (mg·L<sup>-1</sup>) and  $k_L$  represents the Langmuir adsorption constant (L·mg<sup>-1</sup>), which is related to the energy of adsorption. The linear form for this mechanism is expressed in Eq.2. Values of  $k_L$  and  $Q_m$  are calculated from a plot of  $C_e/Q_e$  versus  $C_e$  (Figure S4a).

$$\frac{C_e}{Q_e} = \frac{C_e}{Q_m} + \frac{1}{k_L Q_m} \quad (2)$$

The Langmuir isotherm model assumes monolayer adsorption onto a surface with a finite number of identical sites. To predict the favorability of an adsorption system, the Langmuir equation may also be expressed in terms of a dimensionless constant separation factor,  $R_L$ , defined as follows:

$$R_L = \frac{1}{(1 + C_m K_L)} \quad (3)$$

Where  $C_m$  is the maximal  $\text{Ag}^+$  initial concentration of the solutions ( $\text{mg}\cdot\text{L}^{-1}$ ),  $R_L$  indicates the favorability and adsorptivity of the adsorption system. It is considered to be a favorable adsorption process when the value is within the range 0 - 1.0.

The Freundlich isotherm model is an empirical equation based on the adsorption on heterogeneous surfaces. The equation can be expressed by Eq. 4.

$$Q_e = k_F C_e^{1/n} \quad (4)$$

Where  $Q_e$  is the equilibrium adsorption capacity of the adsorbent ( $\text{mg}\cdot\text{g}^{-1}$ ),  $C_e$  is the equilibrium concentrations of  $\text{Ag}^+$  ( $\text{mg}\cdot\text{L}^{-1}$ ) and  $k_F$  represents the Freundlich adsorption constant ( $\text{mg}\cdot\text{g}^{-1}$ ). It is considered to be a favorable adsorption process when the  $1/n$  value is within the range 0.1 ~ 1.0. The linear form for this mechanism is expressed in Eq.5. Values of  $k_F$  and  $1/n$  are calculated from a plot of  $\ln Q_e$  versus  $\ln C_e$  (Figure S4b).

$$\ln Q_e = \ln k_F + \frac{1}{n} \ln C_e \quad (5)$$

## 5 Adsorption Kinetics

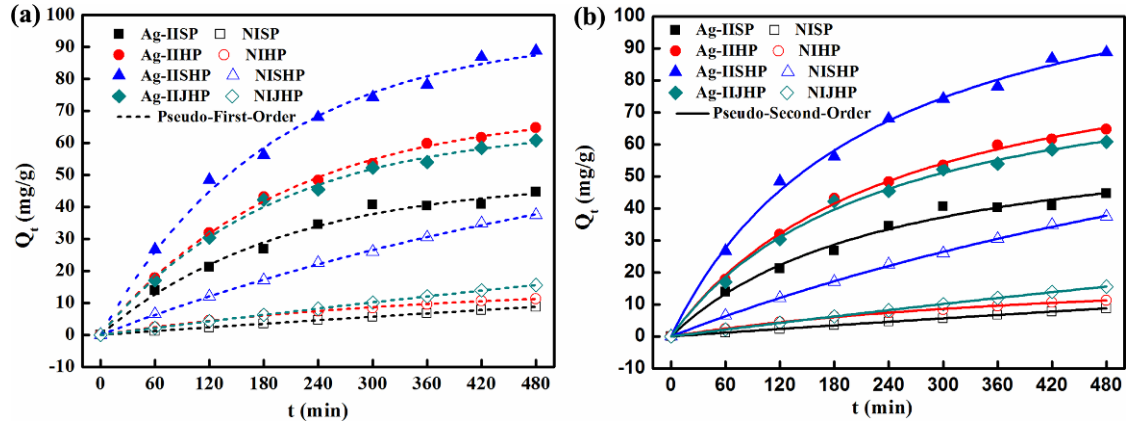

**Figure S5** The nonlinear fit of Pseudo-first-order and Pseudo-second-order models for  $\text{Ag}^+$  adsorption onto the Ag-IIPs and NIPs

The adsorption kinetics for  $\text{Ag}^+$  adsorption onto the Ag-IIPs was investigated with the help of two kinetic models, namely the Lagergren pseudo-first-order model and pseudo-second-order model. The pseudo-first-order and pseudo-second-order models are expressed by the following Eq.6 & 7.

$$\ln(Q_e - Q_t) = \ln Q_e - k_1 t \quad (6)$$

$$\frac{t}{Q_t} = \frac{1}{k_2 Q_e^2} + \frac{t}{Q_e} \quad (7)$$

Where  $Q_e$  and  $Q_t$  are the adsorption capacity of the adsorbent ( $\text{mg} \cdot \text{g}^{-1}$ ) at equilibrium and at time  $t$  (min),  $k_1$  ( $\text{L} \cdot \text{min}^{-1}$ ) and  $k_2$  ( $\text{g} \cdot \text{mg}^{-1} \cdot \text{min}^{-1}$ ) are the equilibrium rate constants of pseudo-first-order and pseudo-second-order model.  $k_1$  is calculated from the slope of the line plotted by  $\ln(Q_e - Q_t)$  versus  $t$ , and  $k_2$  is calculated from the slope and intercept of the line plotted by  $t/Q_t$  versus  $t$ , respectively.

Weber-Morris intra-particle diffusion model, which is widely used for adsorption, has been applied to investigate the mechanism for  $\text{Ag}^+$  adsorption onto the Ag-IIPs. The intra-particle diffusion model is expressed by the following Eq.8.



$$Q_t = k_{\text{int}} t^{1/2} + C \quad (8)$$

Where  $Q_t$  is the adsorption capacity of the adsorbent ( $\text{mg} \cdot \text{g}^{-1}$ ) at time  $t$  (min),  $k_{\text{int}}$  is the the intra-particle diffusion rate constant ( $\text{mg} \cdot \text{g}^{-1} \cdot \text{min}^{-1/2}$ ).  $C$  is the intercept, which is an indicator for expressing the boundary layer thickness.  $k_{\text{int}}$  and  $C$  are calculated from the slope and intercept of the line plotted by  $Q_t$  versus  $t^{1/2}$ , respectively.

## 6 Selectivity parameters

Distribution coefficients ( $K_d$ ,  $\text{mL}\cdot\text{g}^{-1}$ ) of  $\text{Cu}^{2+}$  and  $\text{Zn}^{2+}$  with respect to  $\text{Ag}^+$  were calculated by Eq. 9.

$$K_d = \frac{C_0 - C_e}{C_e} \frac{V}{m} \quad (9)$$

Where  $K_d$  represents the distribution coefficient,  $C_0$ , and  $C_e$  are the initial and equilibrium concentrations of  $\text{Ag}^+$  ( $\text{mg}\cdot\text{mL}^{-1}$ ), respectively.  $V$  is the volume of the adsorption solution (mL), and  $m$  is the adsorbent mass (g).

Selectivity coefficient ( $k$ ) for the  $\text{Ag}^+$  adsorption in the presence of interfering ions can be calculated by Eq. 10.

$$k = \frac{K_d (\text{imprinting ion})}{K_d (\text{interfering ion})} \quad (10)$$

Relative selectivity coefficient ( $k'$ ) can be defined as

$$k = \frac{k(\text{Ag-IIPs})}{k(\text{NIPs})} \quad (11)$$

All above coefficients provided an evaluation of the effect of ion-imprinting technology on selectivity.
